# Supplementary material
Source: publisher figshare collection journal article supplement (https://adisjournals.figshare.com/ndownloader/files/38055897)
Supplement: Supplementary file 1 [file 38055897]

## Sotorasib: Adis Evaluation

### Clinical Considerations

- First approved drug that inhibits KRAS<sup>G12C</sup>; irreversibly binds to the unique cysteine residue at codon 12
- Once daily oral treatment
- Clinically relevant objective response rate observed in patients with *KRAS G12C* mutation-positive NSCLC
- Manageable tolerability profile

### Plain Language Summary

#### *Background and rationale*

- KRAS is a protein that is involved in cell signalling pathways, including those that are associated with cell growth and differentiation.
- *KRAS* mutations are detected in 23% of patients with non-small cell lung cancer (NSCLC), with the *G12C* mutation being the most common.
- *G12C*-mutant KRAS (KRAS<sup>G12C</sup>) is kept in an activated state, which is associated with cancer.

#### *Clinical findings*

- Sotorasib (LUMAKRAS™ in the USA and LUMYKRAS™ in the EU), which is taken orally once daily, is the first approved drug that inhibits KRAS<sup>G12C</sup>; it permanently binds to KRAS<sup>G12C</sup> and locks it in an inactivated state.
- Sotorasib is approved for adults who have advanced, previously treated, *KRAS G12C* mutation-positive NSCLC.
- In a clinical trial in patients with *KRAS G12C* mutation-positive NSCLC, a clinically relevant proportion of patients responded to sotorasib treatment. Furthermore, the duration of effectiveness with sotorasib was considered to be clinically relevant.
- Adverse reactions with sotorasib treatment were manageable; the dose may be decreased and/or sotorasib treatment may be temporarily stopped to manage adverse reactions.

#### *Conclusion*

Overall, sotorasib is a promising treatment option for patients with *KRAS G12C* mutation-positive NSCLC who have received at least one prior systemic therapy.

This plain language summary represents the opinions of the author. For a full list of declarations, including funding and author disclosure statements, and copyright information, please see the full text online. © Springer Nature Switzerland AG 2022.
